# Supplementary material
Source: MDPI journal article supplement (https://www.mdpi.com/1999-4907/13/5/726)
Supplement: s1 [file s1 › forests-1668816-SI.pdf]

**Table S1.** State forest management institution (community forestry) in achieving national forestry goals in Nepal (Based on [15])

| Criteria                                    | Indicators                                               | Combination of indicators                                                                                                                                         | Ordinal scale | Overall performance | Means of verification                                                                                                                   |
|---------------------------------------------|----------------------------------------------------------|-------------------------------------------------------------------------------------------------------------------------------------------------------------------|---------------|---------------------|-----------------------------------------------------------------------------------------------------------------------------------------|
| C1<br>Orientation towards market demand     | I 1.1 Substantial revenue generation from wood products  | Substantial revenue generation from timber and non-timber forest products AND marketing competency both exists                                                    | 3             | 1                   | Semi structure interview, questionnaire survey, Government/Non-Governmental Organization reports and research papers                    |
|                                             | I 1.2 Marketing competency                               | Substantial revenue generation from timber and non-timber forest products BUT marketing competency does not exist                                                 | 2             |                     |                                                                                                                                         |
|                                             |                                                          | Marketing competency exists BUT no substantial revenue generation from timber and non-timber forest products                                                      | 1             |                     |                                                                                                                                         |
|                                             |                                                          | No                                                                                                                                                                | 0             |                     |                                                                                                                                         |
| C2<br>Orientation towards non-market demand | I 2.1 Sensitization on ecosystem services concept        | Substantial revenue generation from ecosystem services AND planning for ecosystem service management AND sensitization on ecosystem services concept              | 3             | 0.5                 | Semi structure interview, questionnaire survey, Government/Non-Governmental Organization reports, CF annual reports and research papers |
|                                             | I 2.2 Planning for ecosystem services management         | Substantial revenue generation from ecosystem services AND planning for ecosystem service management BUT no sensitization on ecosystem services concept           | 2             |                     |                                                                                                                                         |
|                                             | I 2.3 Revenue generation from ecosystem services         | Substantial revenue generation from ecosystem services exists BUT no planning for ecosystem service management AND no sensitization on ecosystem services concept | 1             |                     |                                                                                                                                         |
|                                             |                                                          | No                                                                                                                                                                | 0             |                     |                                                                                                                                         |
| C3<br>Sustained forest stands               | I 3.1 Formulation of sustainable forest management plans | Updated as well as approved SFM plans exists AND effective implementation of SFM plans exists                                                                     | 3             | 1                   | Semi structure interview, questionnaire survey, Government/Non-Governmental Organization reports and research papers                    |
|                                             |                                                          | Updated as well as approved SFM plans exists BUT no effective implementation of SFM plans                                                                         | 2             |                     |                                                                                                                                         |
|                                             | I 3.2 Implementation of SFM plans                        | Implementation of SFM plan exists BUT no updated and approved SFM plans                                                                                           | 1             |                     |                                                                                                                                         |
|                                             |                                                          | No                                                                                                                                                                | 0             |                     |                                                                                                                                         |
| C4<br>Technical efficiency                  | I 4.1 Optimal utilization of local resources             | Managerial accounting exists AND technical productivity of CF is high                                                                                             | 3             | 0.5                 | Semi structure interview, questionnaire survey, Government/Non-Governmental Organization reports and research papers                    |
|                                             |                                                          | Managerial accounting exists BUT technical productivity of CF is medium                                                                                           | 2             |                     |                                                                                                                                         |
|                                             | I 4.2 Managerial accounting                              | No managerial accounting exists AND technical productivity of CF is low                                                                                           | 1             |                     |                                                                                                                                         |
|                                             |                                                          | No managerial accounting exists AND technical productivity of CF is very low                                                                                      | 0             |                     |                                                                                                                                         |

|                                         |                                                                            |                                                                                                                              |   |     |                                                                                                                      |
|-----------------------------------------|----------------------------------------------------------------------------|------------------------------------------------------------------------------------------------------------------------------|---|-----|----------------------------------------------------------------------------------------------------------------------|
| C5 Profits from forests                 | I 5.1 Annual economic return from forests                                  | Annual profit is high for most of the CFs                                                                                    | 3 | 1   | Semi structure interview, questionnaire survey, Government/Non-Governmental Organization reports and research papers |
|                                         |                                                                            | Annual profit is average/medium for most of the CFs                                                                          | 2 |     |                                                                                                                      |
|                                         |                                                                            | Annual profit is low for most of the CFs                                                                                     | 1 |     |                                                                                                                      |
|                                         |                                                                            | Annual profit is very low for most of the CFs                                                                                | 0 |     |                                                                                                                      |
| C6 Orientation towards new forest goods | I 6.1 Market research and customer need assessment for new products        | Market research for new products development exists AND have product development/ business plan for new products             | 3 | 0.5 | Semi structure interview, questionnaire survey, Government/Non-Governmental Organization reports and research papers |
|                                         |                                                                            | Preparation of product development/ business plan for new products exists BUT no market research for new product development | 2 |     |                                                                                                                      |
|                                         | I 6.2 Product development/ business plans for new products                 | Market research for new product development exists BUT no product development/ business plan for new products                | 1 |     |                                                                                                                      |
|                                         |                                                                            | No market research for new products AND no preparation of product development/ business plan for new products                | 0 |     |                                                                                                                      |
| C7 Speaker for forestry                 | I 7.1 Trustful cooperation with actors from forestry sector                | Trustful cooperation with key forest sector stakeholders AND speaker's role accepted                                         | 3 | 2   | Semi structure interview, questionnaire survey, Government/Non-Governmental Organization reports                     |
|                                         |                                                                            | Trustful cooperation with key forest sector stakeholders BUT no speaker's role accepted                                      | 2 |     |                                                                                                                      |
|                                         | I 7.2 Speaker role accepted                                                | Speaker's role accepted BUT no trustful cooperation with key forest sector stakeholders                                      | 1 |     |                                                                                                                      |
|                                         |                                                                            | No                                                                                                                           | 0 |     |                                                                                                                      |
| C8 Mediator of all interests in forests | I 8.1 Trust and cooperation among central, provincial and local government | Trustful cooperation of CF with central, provincial and local Government AND mediator's role accepted                        | 3 | 2   | Semi structure interview, questionnaire survey, Government/Non-Governmental Organization reports                     |
|                                         |                                                                            | Trustful cooperation of CF with central, provincial and local Government BUT mediator's role not accepted                    | 2 |     |                                                                                                                      |
|                                         | I 8.2 Mediator role accepted                                               | Mediator's role not accepted BUT NO trustful cooperation of CF with central, provincial and local government                 | 1 |     |                                                                                                                      |
|                                         |                                                                            | No                                                                                                                           | 0 |     |                                                                                                                      |

**Table S2.** Performance of list of semi-structured interviewees

| Nr. | Position                 | Organization                                                                                    | Interview date |
|-----|--------------------------|-------------------------------------------------------------------------------------------------|----------------|
| I1  | Joint Secretary          | Federal Ministry of Forests and Environment (MFE)                                               | April 10, 2021 |
| I2  | Under Secretary          | Federal Ministry of Forests and Environment (MFE)                                               | April 5, 2021  |
| I3  | Forest Officer           | Federal Ministry of Forests and Environment (MFE)                                               | April 6, 2021  |
| I4  | Under Secretary          | Provincial Ministry of Industry, Tourism Forests and Environment (MITFE), Gandaki Province      | April 3, 2021  |
| I5  | Under Secretary          | Provincial Ministry of Industry, Tourism Forests and Environment (MITFE), Sudhuraschim Province | April 7, 2021  |
| I6  | Division Forest Officer  | Division Forest Office, Dadeldhura/ MITFE, Sudhuraschim Province                                | April 13, 2021 |
| I7  | Chairperson              | Federation of Community Forestry Users Nepal (FECOFUN)                                          | April 5, 2021  |
| I8  | Policy Expert            | Nepal Foresters Association (NFA)                                                               | March 28, 2021 |
| I9  | Donor Representative     | International Fund for Agriculture Development (IFAD)                                           | April 4, 2021  |
| I10 | Researcher/PhD Candidate | University of New South Wales, Australia                                                        | April 11, 2021 |

**Table S3.** List of questionnaire survey

| Nr. | Date and time    | Position       | Organization                  |
|-----|------------------|----------------|-------------------------------|
| 1   | 4/7/2021, 18:41  | Lecturer       | Academic Institution          |
| 2   | 4/7/2021, 19:37  | Researcher     | Non-Governmental Organization |
| 3   | 4/8/2021, 15:50  | Researcher     | Academic Institution          |
| 4   | 4/8/2021, 17:23  | Researcher     | Academic Institution          |
| 5   | 4/8/2021, 17:27  | Forest Officer | Government Institution        |
| 6   | 4/8/2021, 18:10  | Forest Officer | Government Institution        |
| 7   | 4/11/2021, 20:15 | Researcher     | Independent Researcher        |
| 8   | 4/11/2021, 23:18 | Lecturer       | Academic Institution          |
| 9   | 4/13/2021, 9:30  | Researcher     | Independent Researcher        |
| 10  | 4/14/2021, 11:02 | Forest officer | Government Institution        |
| 11  | 4/14/2021, 17:12 | Forest officer | Government Institution        |
| 12  | 4/15/2021, 23:21 | Lecturer       | Academic Institution          |
| 13  | 4/19/2021, 12:58 | Forest officer | Government Institution        |
| 14  | 4/19/2021, 15:39 | Forest officer | Government Institution        |
| 15  | 4/23/2021, 12:24 | Forest officer | Government Institution        |
